# Supplementary material
Source: PubMed Central journal article supplement (PMC555530)

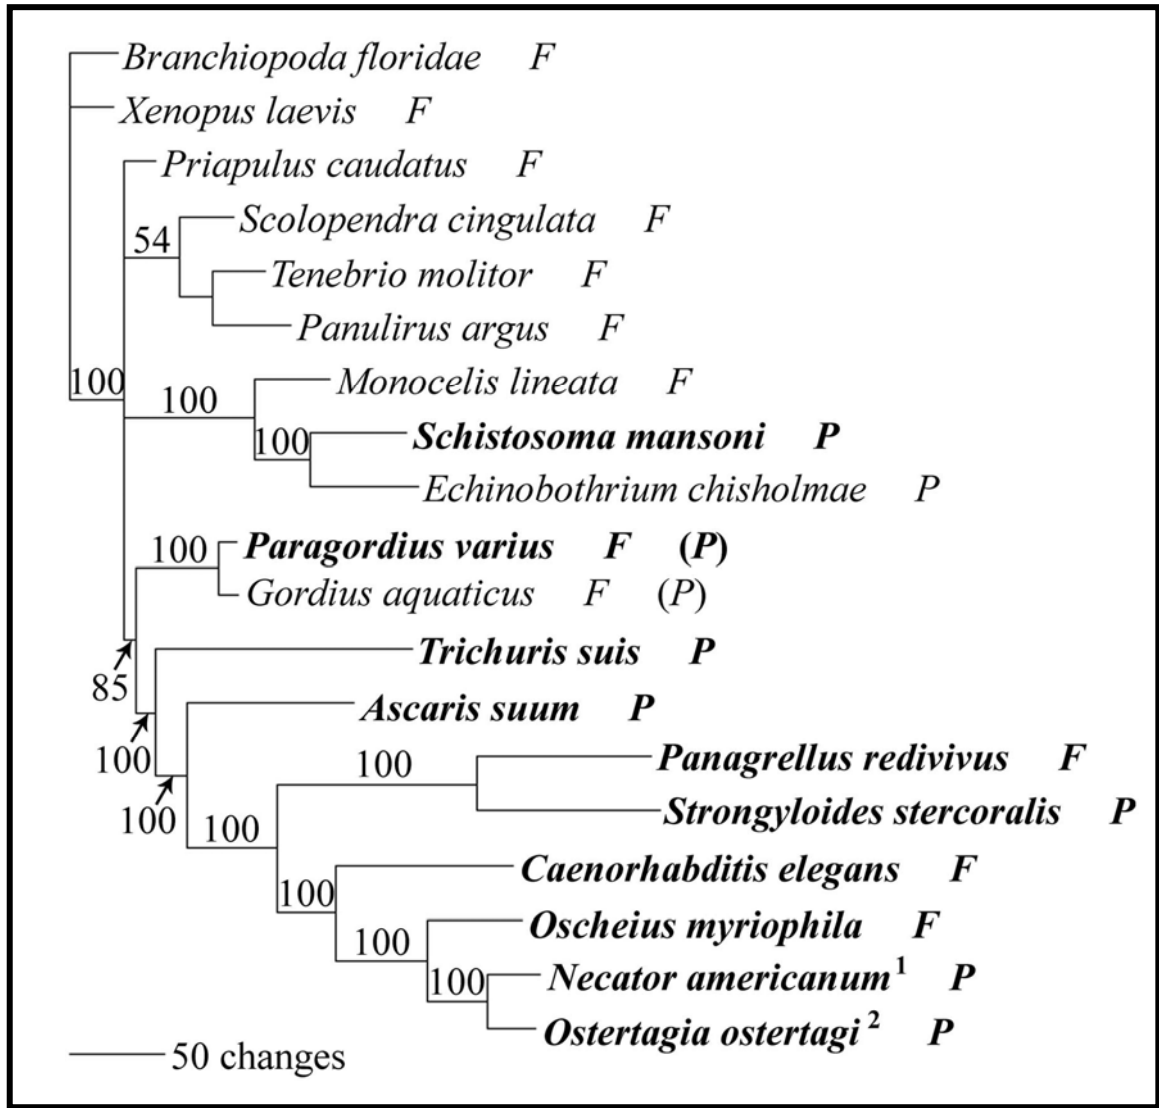

Supplement: pnas_102_12_4270__3.pdf [file pnas_102_12_4270__3.pdf]

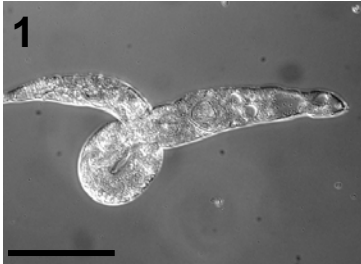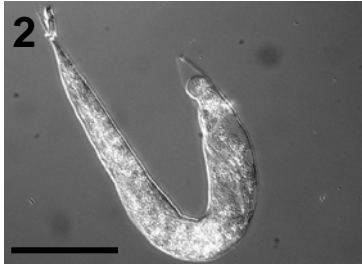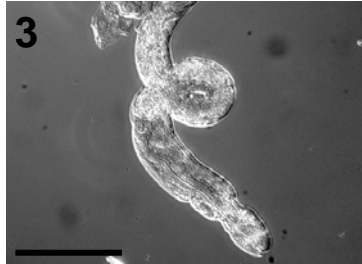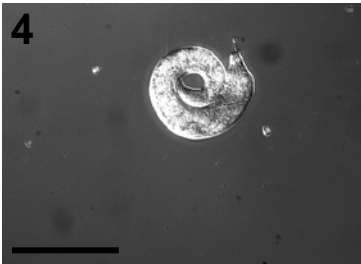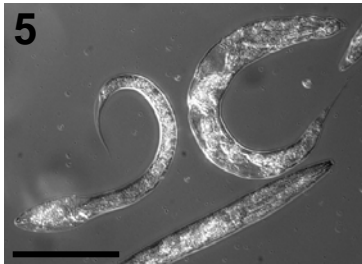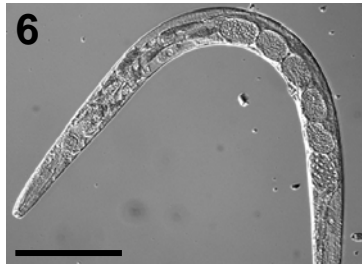

Supplement: pnas_102_12_4270__5.pdf [file pnas_102_12_4270__5.pdf]
